# Supplementary material for: Wounding of Arabidopsis halleri leaves enhances cadmium accumulation that acts as a defense against herbivory
Source: PubMed Central journal article supplement (PMC4427619; doi:10.1007/s10534-015-9829-9), 2015-03-10
Supplement: 10534_2015_9829_MOESM2_ESM.pdf [file 10534_2015_9829_MOESM2_ESM.pdf]

Supplementary Table 2

| <b>Supplementary Table 2. Genes differentially expressed in roots of <i>A. thaliana</i> 5 h after leaf wounding.</b> Given are AGI number, the ratio of the microarray signal of wounded vs. non-wounded plants calculated from the arithmetic mean of log-transformed values, annotation, short gene name, and functional or regulatory class for selected relevant classes. Microarray expression signals of shown genes changed by > 1.5-fold (increase or decrease) in response to leaf wounding, compared to non-wounded controls ( $P < 0.05$ ). Plants were transferred into a hydroponic culture solution supplemented with 0.5 $\mu$ M Cd 5 d prior to simulated herbivory on a single leaf. Annotations are underlined for genes differentially expressed in response to wounding when compared to controls in both <i>A. halleri</i> and in <i>A. thaliana</i> . OPDA: 12-oxo-phytodienoic acid. |              |         |                                                                                                                 |                |                                                                                                             |
|-------------------------------------------------------------------------------------------------------------------------------------------------------------------------------------------------------------------------------------------------------------------------------------------------------------------------------------------------------------------------------------------------------------------------------------------------------------------------------------------------------------------------------------------------------------------------------------------------------------------------------------------------------------------------------------------------------------------------------------------------------------------------------------------------------------------------------------------------------------------------------------------------------------|--------------|---------|-----------------------------------------------------------------------------------------------------------------|----------------|-------------------------------------------------------------------------------------------------------------|
| AGI Number                                                                                                                                                                                                                                                                                                                                                                                                                                                                                                                                                                                                                                                                                                                                                                                                                                                                                                  | Signal ratio | P value | Annotation                                                                                                      | Name           | Class                                                                                                       |
| At3g23820                                                                                                                                                                                                                                                                                                                                                                                                                                                                                                                                                                                                                                                                                                                                                                                                                                                                                                   | 1.82         | 0.0083  | <u>UDP-D-Glucuronate 4-epimerase 6, similar to NAD-dependent epimerase/dehydratase family protein</u>           | GAE6           |                                                                                                             |
| At1g19180                                                                                                                                                                                                                                                                                                                                                                                                                                                                                                                                                                                                                                                                                                                                                                                                                                                                                                   | 1.81         | 0.0221  | unknown protein                                                                                                 |                | Local herbivory response/Cold-, drought- and UVB-stress response/ Methyl jasmonate response                 |
| At2g43680                                                                                                                                                                                                                                                                                                                                                                                                                                                                                                                                                                                                                                                                                                                                                                                                                                                                                                   | 1.80         | 0.0048  | calmodulin-binding family protein                                                                               | IQD14          |                                                                                                             |
| At4g11320                                                                                                                                                                                                                                                                                                                                                                                                                                                                                                                                                                                                                                                                                                                                                                                                                                                                                                   | 1.78         | 0.0356  | cysteine proteinase similar to RD21A                                                                            |                | Local herbivory response                                                                                    |
| At3g22440                                                                                                                                                                                                                                                                                                                                                                                                                                                                                                                                                                                                                                                                                                                                                                                                                                                                                                   | 1.73         | 0.0038  | hydroxyproline-rich glycoprotein family protein                                                                 |                |                                                                                                             |
| At1g19570                                                                                                                                                                                                                                                                                                                                                                                                                                                                                                                                                                                                                                                                                                                                                                                                                                                                                                   | 1.73         | 0.0040  | dehydroascorbate reductase 1                                                                                    | DHAR1          | Local herbivory response/ Methyl jasmonate response                                                         |
| At4g33420                                                                                                                                                                                                                                                                                                                                                                                                                                                                                                                                                                                                                                                                                                                                                                                                                                                                                                   | 1.72         | 0.0043  | <u>peroxidase 47 precursor, putative peroxidase, haem peroxidase domain</u>                                     | PER47          | Methyl jasmonate response                                                                                   |
| At3g47810                                                                                                                                                                                                                                                                                                                                                                                                                                                                                                                                                                                                                                                                                                                                                                                                                                                                                                   | 1.72         | 0.0167  | calceineurin-like phosphoesterase family protein, putative serine/threonine phosphatase                         | MAG1           |                                                                                                             |
| At4g22010                                                                                                                                                                                                                                                                                                                                                                                                                                                                                                                                                                                                                                                                                                                                                                                                                                                                                                   | 1.70         | 0.0169  | SKU5 similar 4, multi-copper oxidase type I family protein                                                      | SKS4           |                                                                                                             |
| At3g16450                                                                                                                                                                                                                                                                                                                                                                                                                                                                                                                                                                                                                                                                                                                                                                                                                                                                                                   | 1.69         | 0.0112  | <u>jacalin lectin family protein</u>                                                                            |                |                                                                                                             |
| At2g30130                                                                                                                                                                                                                                                                                                                                                                                                                                                                                                                                                                                                                                                                                                                                                                                                                                                                                                   | 1.69         | 0.0057  | phosphoenolpyruvate carboxykinase 1, lateral organ boundaries (LOB) domain protein 12 (LBD12)                   | ASL5/<br>LBD12 |                                                                                                             |
| At1g31730                                                                                                                                                                                                                                                                                                                                                                                                                                                                                                                                                                                                                                                                                                                                                                                                                                                                                                   | 1.69         | 0.0070  | putative clathrin-binding epsilon-adaptin                                                                       |                |                                                                                                             |
| At2g27860                                                                                                                                                                                                                                                                                                                                                                                                                                                                                                                                                                                                                                                                                                                                                                                                                                                                                                   | 1.69         | 0.0065  | UDP-D-apiose/UDP-D-xylose synthase 1                                                                            | AXS1           |                                                                                                             |
| At1g52060                                                                                                                                                                                                                                                                                                                                                                                                                                                                                                                                                                                                                                                                                                                                                                                                                                                                                                   | 1.68         | 0.0078  | <u>jacalin lectin family protein</u>                                                                            |                |                                                                                                             |
| At2g47180                                                                                                                                                                                                                                                                                                                                                                                                                                                                                                                                                                                                                                                                                                                                                                                                                                                                                                   | 1.65         | 0.0124  | galactinol synthase 1                                                                                           | GOLS1          | Local herbivory response/ Cold-, drought- and UVB-stress response/ NaCl response/ Methyl jasmonate response |
| At3g63460                                                                                                                                                                                                                                                                                                                                                                                                                                                                                                                                                                                                                                                                                                                                                                                                                                                                                                   | 1.64         | 0.0130  | embryo defective 2221, WD-40 repeat family protein                                                              | AMB2221        |                                                                                                             |
| At4g14905                                                                                                                                                                                                                                                                                                                                                                                                                                                                                                                                                                                                                                                                                                                                                                                                                                                                                                   | 1.64         | 0.0006  | kelch repeat-containing F-box family protein                                                                    |                |                                                                                                             |
| At5g60980                                                                                                                                                                                                                                                                                                                                                                                                                                                                                                                                                                                                                                                                                                                                                                                                                                                                                                   | 1.64         | 0.0046  | nuclear transport factor 2 (NTF2) family protein / RNA recognition motif (RRM)-containing protein               |                |                                                                                                             |
| At3g49130                                                                                                                                                                                                                                                                                                                                                                                                                                                                                                                                                                                                                                                                                                                                                                                                                                                                                                   | 1.62         | 0.0064  | RNA binding similar to SWAP (Suppressor-of-White-Apricot)/surp domain-containing protein                        |                |                                                                                                             |
| At3g14860                                                                                                                                                                                                                                                                                                                                                                                                                                                                                                                                                                                                                                                                                                                                                                                                                                                                                                   | 1.62         | 0.0035  | NHL repeat-containing protein                                                                                   |                |                                                                                                             |
| At5g48385                                                                                                                                                                                                                                                                                                                                                                                                                                                                                                                                                                                                                                                                                                                                                                                                                                                                                                   | 1.61         | 0.0062  | similar to hydroxyproline-rich glycoprotein family protein                                                      |                |                                                                                                             |
| At1g29660                                                                                                                                                                                                                                                                                                                                                                                                                                                                                                                                                                                                                                                                                                                                                                                                                                                                                                   | 1.61         | 0.0078  | GDSL-motif lipase/hydrolase family protein                                                                      |                | NaCl response/ Methyl jasmonate response                                                                    |
| At1g18040                                                                                                                                                                                                                                                                                                                                                                                                                                                                                                                                                                                                                                                                                                                                                                                                                                                                                                   | 1.61         | 0.0140  | cyclin-dependent kinase D1;3                                                                                    | CDKD1;3        |                                                                                                             |
| At1g75800                                                                                                                                                                                                                                                                                                                                                                                                                                                                                                                                                                                                                                                                                                                                                                                                                                                                                                   | 1.58         | 0.0180  | pathogenesis-related thaumatin family protein                                                                   |                | Methyl jasmonate response                                                                                   |
| At4g32020                                                                                                                                                                                                                                                                                                                                                                                                                                                                                                                                                                                                                                                                                                                                                                                                                                                                                                   | 1.57         | 0.0120  | unknown protein                                                                                                 |                | Local herbivory response/ NaCl response                                                                     |
| At4g34150                                                                                                                                                                                                                                                                                                                                                                                                                                                                                                                                                                                                                                                                                                                                                                                                                                                                                                   | 1.57         | 0.0148  | C2 domain-containing protein                                                                                    |                |                                                                                                             |
| At1g23960                                                                                                                                                                                                                                                                                                                                                                                                                                                                                                                                                                                                                                                                                                                                                                                                                                                                                                   | 1.56         | 0.0022  | unknown protein                                                                                                 |                |                                                                                                             |
| At3g53100                                                                                                                                                                                                                                                                                                                                                                                                                                                                                                                                                                                                                                                                                                                                                                                                                                                                                                   | 1.56         | 0.0018  | GDSL-motif lipase/hydrolase family protein                                                                      |                |                                                                                                             |
| At3g47470                                                                                                                                                                                                                                                                                                                                                                                                                                                                                                                                                                                                                                                                                                                                                                                                                                                                                                   | 1.56         | 0.0046  | Photosystem I light harvesting complex gene 4, chlorophyll a/b binding protein                                  | LHCA4          |                                                                                                             |
| At2g43520                                                                                                                                                                                                                                                                                                                                                                                                                                                                                                                                                                                                                                                                                                                                                                                                                                                                                                   | 1.55         | 0.0016  | <u>trypsin inhibitor protein 2, putative trypsin inhibitor</u>                                                  | TI2            | Methyl jasmonate response                                                                                   |
| At1g10840                                                                                                                                                                                                                                                                                                                                                                                                                                                                                                                                                                                                                                                                                                                                                                                                                                                                                                   | 1.55         | 0.0034  | eukaryotic translation initiation factor 3 subunit H1, eIF-3 gamma                                              | TIF3H1         |                                                                                                             |
| At4g15910                                                                                                                                                                                                                                                                                                                                                                                                                                                                                                                                                                                                                                                                                                                                                                                                                                                                                                   | 1.55         | 0.0027  | drought-induced 21                                                                                              | DI21           |                                                                                                             |
| At3g15240                                                                                                                                                                                                                                                                                                                                                                                                                                                                                                                                                                                                                                                                                                                                                                                                                                                                                                   | 1.54         | 0.0190  | unknown protein                                                                                                 |                |                                                                                                             |
| At4g11070                                                                                                                                                                                                                                                                                                                                                                                                                                                                                                                                                                                                                                                                                                                                                                                                                                                                                                   | 1.54         | 0.0180  | WRKY DNA-binding protein 41, transcription factor                                                               | WRKY41         |                                                                                                             |
| At1g14710                                                                                                                                                                                                                                                                                                                                                                                                                                                                                                                                                                                                                                                                                                                                                                                                                                                                                                   | 1.54         | 0.0084  | hydroxyproline-rich glycoprotein family protein, 2-OG-Fe(II) oxygenase family protein                           |                |                                                                                                             |
| At3g01680                                                                                                                                                                                                                                                                                                                                                                                                                                                                                                                                                                                                                                                                                                                                                                                                                                                                                                   | 1.53         | 0.0078  | unknown protein, putative thioredoxin domain                                                                    |                |                                                                                                             |
| At2g41370                                                                                                                                                                                                                                                                                                                                                                                                                                                                                                                                                                                                                                                                                                                                                                                                                                                                                                   | 1.52         | 0.0249  | Blade on petiole 2, cytoplasmic and nuclear-localized NPR1 like protein with BTB/POZ domain and ankyrin repeats | BOP2           |                                                                                                             |
| At1g22335                                                                                                                                                                                                                                                                                                                                                                                                                                                                                                                                                                                                                                                                                                                                                                                                                                                                                                   | 1.52         | 0.0147  | similar to RNA recognition motif (RRM)-containing protein                                                       |                |                                                                                                             |
| At5g54770                                                                                                                                                                                                                                                                                                                                                                                                                                                                                                                                                                                                                                                                                                                                                                                                                                                                                                   | 1.52         | 0.0013  | Thiazole requiring 1, thiamine biosynthesis and mitochondrial DNA damage tolerance                              | THI1/ ARA6     | NaCl response                                                                                               |

Supplementary Table 2

| AGI Number | Signal ratio | P value | Annotation                                                                                   | Name    | Class                                                   |
|------------|--------------|---------|----------------------------------------------------------------------------------------------|---------|---------------------------------------------------------|
| At3g48650  | 1.52         | 0.0057  | pseudogene, At14a-related protein                                                            |         |                                                         |
| At4g01950  | 1.51         | 0.0047  | glycerol-3-phosphate acyl transferase 3                                                      | GPAT3   | OPDA response/ NaCl response/ Methyl jasmonate response |
| At3g18540  | 1.51         | 0.0023  | unknown protein                                                                              |         |                                                         |
| At5g65790  | 1.51         | 0.0080  | myb domain protein 68, transcription factor                                                  | MYB68   | Methyl jasmonate response                               |
| At4g12650  | 1.50         | 0.0194  | endomembrane protein 70, putative                                                            |         |                                                         |
| At3g24180  | 0.67         | 0.0222  | unknown protein                                                                              |         |                                                         |
| At3g13062  | 0.67         | 0.0079  | unknown protein                                                                              |         |                                                         |
| At3g54270  | 0.67         | 0.0043  | sucrose-phosphatase 3                                                                        | SPP3    |                                                         |
| At1g07795  | 0.67         | 0.0205  | unknown protein                                                                              |         |                                                         |
| At2g45220  | 0.67         | 0.0351  | pectinesterase family protein                                                                |         |                                                         |
| At5g46230  | 0.67         | 0.0106  | unknown protein                                                                              |         |                                                         |
| At5g02740  | 0.67         | 0.0050  | unknown protein, nucleotide binding                                                          |         | NaCl response                                           |
| At3g21700  | 0.66         | 0.0051  | unknown protein, similar to GTP-binding family                                               |         |                                                         |
| At4g29220  | 0.66         | 0.0325  | phosphofructokinase family protein                                                           |         | Upregulated under iron deficiency                       |
| At3g07780  | 0.66         | 0.0053  | unknown protein, zinc binding                                                                |         |                                                         |
| At1g74055  | 0.66         | 0.0087  | unknown protein                                                                              |         |                                                         |
| At5g57360  | 0.66         | 0.0217  | ubiquitin-protein ligase, clock-associated PAS protein                                       | ZTL     | NaCl response                                           |
| At5g13150  | 0.66         | 0.0103  | exocyst subunit EXO70 family protein C1                                                      | EXO70C1 |                                                         |
| At5g19700  | 0.66         | 0.0284  | MATE efflux protein-related                                                                  |         |                                                         |
| At5g65683  | 0.66         | 0.0023  | zinc finger (C3HC4-type RING finger) family protein, ubiquitin-protein ligase                |         |                                                         |
| At5g50660  | 0.66         | 0.0359  | unknown protein                                                                              |         |                                                         |
| At3g51990  | 0.66         | 0.0048  | protein kinase family protein                                                                |         |                                                         |
| At1g02900  | 0.66         | 0.0089  | Rapid Alkalinization Factor (RALF)-like 1 protein                                            | RALFL1  |                                                         |
| At3g12870  | 0.66         | 0.0009  | unknown protein                                                                              |         |                                                         |
| At3g51930  | 0.66         | 0.0022  | WD-40 repeat family protein, transducin family protein                                       |         |                                                         |
| At2g40320  | 0.66         | 0.0210  | unknown protein, similar to steroid hormone receptor/                                        |         |                                                         |
| At2g31120  | 0.66         | 0.0074  | transcription factor                                                                         |         |                                                         |
| At5g40730  | 0.66         | 0.0329  | unknown protein                                                                              |         |                                                         |
| At1g27640  | 0.66         | 0.0196  | arabinogalactan protein 24                                                                   | AGP24   |                                                         |
| At4g32950  | 0.66         | 0.0333  | putative protein phosphatase 2c                                                              |         |                                                         |
| At2g29250  | 0.66         | 0.0407  | lectin protein kinase, putative                                                              |         |                                                         |
| At1g79410  | 0.66         | 0.0251  | organic cation transporter-related, major facilitator superfamily                            |         | Methyl jasmonate response                               |
| At2g36100  | 0.66         | 0.0351  | integral membrane family protein                                                             |         |                                                         |
| At5g19970  | 0.66         | 0.0222  | unknown protein                                                                              |         | Methyl jasmonate response                               |
| At3g61060  | 0.66         | 0.0123  | Phloem protein 2-A13, F-box family protein, galactose-binding like                           | PP2-A13 | Methyl jasmonate response                               |
| At4g13510  | 0.66         | 0.0123  | ammonium transporter 1;1, high-affinity plasma membrane ammonium uptake system               | AMT1;1  | Methyl jasmonate response                               |
| At3g16170  | 0.66         | 0.0440  | acyl-activating enzyme 13                                                                    | AAE13   |                                                         |
| At1g72160  | 0.66         | 0.0278  | patellin-3, SEC14 cytosolic factor family protein / phosphoglyceride transfer family protein | PATL3   |                                                         |
| At3g50740  | 0.66         | 0.0083  | UDP-glucosyl transferase 72E1                                                                | UGT72E1 | Upregulated under iron deficiency                       |
| At2g17705  | 0.66         | 0.0038  | putative protein-methionine-S-oxide reductase                                                |         |                                                         |
| At5g54585  | 0.66         | 0.0326  | unknown protein                                                                              |         |                                                         |
| At4g20320  | 0.66         | 0.0085  | putative CTP synthase / putative UTP-ammonia ligase                                          |         |                                                         |
| At3g13910  | 0.65         | 0.0127  | unknown protein                                                                              |         | Methyl jasmonate response                               |
| At1g65690  | 0.65         | 0.0490  | harpin-induced protein-related / HIN1-related / harpin-responsive protein-related            |         | OPDA response/ Methyl jasmonate response                |
| At4g00650  | 0.65         | 0.0020  | FRIGIDA protein                                                                              | FRI     |                                                         |
| At2g24710  | 0.65         | 0.0057  | glutamate receptor 2.3, putative ligand-gated ion channel subunit                            | GLR2.3  |                                                         |
| At3g51160  | 0.65         | 0.0108  | GDP-D-mannose-4,6-dehydratase 2, first step in the                                           |         |                                                         |
| At2g29870  | 0.65         | 0.0462  | de novo synthesis of GDP-L-fucose                                                            | MUR1    |                                                         |
| At2g29870  | 0.65         | 0.0462  | major intrinsic protein (MIP) family protein                                                 |         |                                                         |
| At3g59840  | 0.65         | 0.0070  | unknown protein                                                                              |         | NaCl response                                           |
| At5g37540  | 0.65         | 0.0189  | aspartyl protease family protein                                                             |         |                                                         |
| At5g14730  | 0.65         | 0.0039  | unknown protein                                                                              |         | Methyl jasmonate response                               |
| At5g65160  | 0.65         | 0.0094  | tetratricopeptide repeat (TPR)-containing protein                                            |         |                                                         |
| At4g33260  | 0.65         | 0.0044  | WD-40 repeat family protein                                                                  | CDC20.2 |                                                         |
| At2g44390  | 0.65         | 0.0403  | DC1 domain-containing protein                                                                |         |                                                         |
| At1g29640  | 0.65         | 0.0135  | unknown protein                                                                              |         |                                                         |
| At3g12500  | 0.65         | 0.0171  | basic endochitinase                                                                          | CHIB    |                                                         |
| At1g65490  | 0.65         | 0.0118  | unknown protein                                                                              |         | Methyl jasmonate response                               |

Supplementary Table 2

| AGI Number | Signal ratio | P value | Annotation                                                                                                                                                      | Name                    | Class                                            |
|------------|--------------|---------|-----------------------------------------------------------------------------------------------------------------------------------------------------------------|-------------------------|--------------------------------------------------|
| At3g04530  | 0.65         | 0.0072  | phosphoenolpyruvate carboxylase kinase 2                                                                                                                        | PPCK2                   |                                                  |
| At1g02120  | 0.65         | 0.0126  | Vascular-associated death 1, GRAM domain-containing protein                                                                                                     | VAD1                    |                                                  |
| At4g37520  | 0.65         | 0.0084  | peroxidase 50, putative peroxidase, haem peroxidase domain                                                                                                      | PER50                   |                                                  |
| At2g34500  | 0.65         | 0.0087  | cytochrome P450, family 710, subfamily A, polypeptide 1, C-22 sterol desaturase/ oxygen binding                                                                 | CYP710A1                |                                                  |
| At1g74770  | 0.65         | 0.0189  | unknown protein                                                                                                                                                 |                         |                                                  |
| At5g02420  | 0.64         | 0.0135  | unknown protein                                                                                                                                                 |                         |                                                  |
| At3g48360  | 0.64         | 0.0042  | BTB and TAZ domain protein 2, transcriptional regulator of the TAC1-mediated telomerase activation pathway                                                      | BT2                     | Cold-, drought- and UVB-stress response          |
| At5g58270  | 0.64         | 0.0044  | STARIK 1, mitochondrial half-size ABC transporter of ATM subfamily                                                                                              | STA1                    |                                                  |
| At1g76680  | 0.64         | 0.0072  | 12-oxophytodienoate reductase 1, jasmonic acid biosynthesis                                                                                                     | OPR1                    | Local herbivory response                         |
| At3g01290  | 0.64         | 0.0162  | band 7 family protein                                                                                                                                           |                         |                                                  |
| At4g22070  | 0.64         | 0.0039  | WRKY DNA-binding protein 31, transcription factor cyclin B1;3, cyclin-dependent protein kinase regulator, B-type mitotic cyclin                                 | WRKY31                  |                                                  |
| At3g11520  | 0.64         | 0.0012  | unknown protein                                                                                                                                                 | CYCB1;3                 |                                                  |
| At4g23870  | 0.64         | 0.0005  | unknown protein                                                                                                                                                 |                         |                                                  |
| At2g18890  | 0.64         | 0.0162  | protein kinase family protein, serine/threonine kinase domain                                                                                                   |                         |                                                  |
| At3g60330  | 0.64         | 0.0316  | Arabidopsis H <sup>+</sup> -ATPASE 7, plasma membrane P-type proton ATPase                                                                                      | AHA7                    | Upregulated under iron deficiency/ OPDA response |
| At3g23730  | 0.64         | 0.0033  | putative xyloglucan:xyloglucosyl transferase, putative xyloglucan endotransglycosylase, putative endo-xyloglucan transferase                                    |                         |                                                  |
| At4g32650  | 0.64         | 0.0410  | putative inward rectifying potassium channel                                                                                                                    | ATKC1/<br>KAT3/<br>AKT4 | Methyl jasmonate response                        |
| At2g34000  | 0.64         | 0.0470  | zinc finger protein-related                                                                                                                                     |                         |                                                  |
| At5g65250  | 0.64         | 0.0102  | unknown protein                                                                                                                                                 |                         |                                                  |
| At1g72200  | 0.64         | 0.0026  | zinc finger (C3HC4-type RING finger) family protein embryo sac development arrest 11, DC1 domain-containing protein                                             | ATL1N                   | Methyl jasmonate response                        |
| At1g55420  | 0.64         | 0.0314  | unknown protein                                                                                                                                                 | EDA11                   |                                                  |
| At3g16920  | 0.63         | 0.0059  | glycoside hydrolase family 19 protein, chitinase-like embryo sac development arrest 28, maternal effect embryo arrest 23, FAD-binding domain-containing protein | EDA28/<br>MEE23         |                                                  |
| At2g34790  | 0.63         | 0.0161  | senescence-associated protein-related                                                                                                                           |                         |                                                  |
| At1g78020  | 0.63         | 0.0125  | senescence-associated protein-related                                                                                                                           |                         |                                                  |
| At1g55850  | 0.63         | 0.0119  | Cellulose synthase-like E1                                                                                                                                      | CSLE1                   | OPDA response                                    |
| At5g37130  | 0.63         | 0.0072  | tetratricopeptide repeat (TPR)-containing protein                                                                                                               |                         |                                                  |
| At1g74940  | 0.63         | 0.0080  | senescence-associated protein-related                                                                                                                           |                         | NaCl response                                    |
| At4g37010  | 0.63         | 0.0356  | putative caltractin/ putative centrin                                                                                                                           |                         | Methyl jasmonate response                        |
| At4g38340  | 0.63         | 0.0095  | RWP-RK domain-containing protein                                                                                                                                |                         |                                                  |
| At5g55970  | 0.63         | 0.0337  | zinc finger (C3HC4-type RING finger) family protein                                                                                                             |                         |                                                  |
| At3g13950  | 0.63         | 0.0259  | unknown protein                                                                                                                                                 |                         |                                                  |
| At1g66200  | 0.63         | 0.0361  | glutamine synthase clone R2, glutamate-ammonia ligase encodes a cytosolic glutamate synthetase                                                                  | GSR2                    |                                                  |
| At2g23960  | 0.63         | 0.0105  | putative defense-related protein                                                                                                                                |                         |                                                  |
| At5g20820  | 0.63         | 0.0066  | auxin-responsive protein-related                                                                                                                                |                         |                                                  |
| At5g35630  | 0.63         | 0.0118  | glutamine synthetase 2, glutamate-ammonia ligase chloroplastic glutamine synthetase                                                                             | GS2                     |                                                  |
| At2g19060  | 0.63         | 0.0199  | GDSL-motif lipase/hydrolase family protein                                                                                                                      |                         |                                                  |
| At1g63570  | 0.63         | 0.0188  | receptor-like protein kinase-related                                                                                                                            |                         |                                                  |
| At1g51790  | 0.63         | 0.0375  | putative leucine-rich repeat protein kinase                                                                                                                     |                         |                                                  |
| At3g14840  | 0.62         | 0.0177  | leucine-rich repeat family protein / protein kinase family protein                                                                                              |                         |                                                  |
| At3g08040  | 0.62         | 0.0081  | ferric reductase defective 3, MATE efflux family protein, plasma membrane citrate effluxer                                                                      | FRD3                    | Metal homeostasis                                |
| At4g26540  | 0.62         | 0.0480  | protein kinase family protein, similar to leucine-rich repeat transmembrane protein kinase                                                                      |                         |                                                  |
| At1g73430  | 0.62         | 0.0074  | sec34-like family protein                                                                                                                                       |                         |                                                  |
| At4g26960  | 0.62         | 0.0003  | unknown protein                                                                                                                                                 |                         |                                                  |

Supplementary Table 2

| AGI Number | Signal ratio | P value | Annotation                                                                                                                     | Name             | Class                                                              |
|------------|--------------|---------|--------------------------------------------------------------------------------------------------------------------------------|------------------|--------------------------------------------------------------------|
| At4g33730  | 0.62         | 0.0037  | <u>putative pathogenesis-related protein</u>                                                                                   |                  |                                                                    |
| At1g08090  | 0.62         | 0.0481  | nitrate transporter 2.1, high-affinity plasma membrane nitrate uptake system, repressor of lateral root initiation             | NRT2;1           |                                                                    |
| At5g55710  | 0.62         | 0.0101  | unknown protein                                                                                                                |                  |                                                                    |
| At2g13810  | 0.62         | 0.0068  | AGD2-like defense response protein 1, transaminase                                                                             | ALD1             |                                                                    |
| At1g76700  | 0.62         | 0.0030  | DNAJ heat shock N-terminal domain-containing protein                                                                           |                  |                                                                    |
| At4g18510  | 0.62         | 0.0112  | Clavata 3-/ ESR-related 2                                                                                                      | CLE2             |                                                                    |
| At2g26250  | 0.62         | 0.0053  | beta-ketoacyl-CoA synthase family (FIDDLEHEAD) (FDH)                                                                           | FDH              |                                                                    |
| At2g37750  | 0.62         | 0.0164  | unknown protein                                                                                                                |                  | OPDA response/ Methyl jasmonate response                           |
| At4g25790  | 0.62         | 0.0069  | <u>putative pathogenesis-related protein, allergen</u><br><u>V5/Tpx-1-related family protein</u>                               |                  |                                                                    |
| At4g15550  | 0.62         | 0.0228  | UDP-glucose:indole-3-acetate beta-D-glucosyltransferase, indole-3-acetate beta-D-glucosyl transferase                          | IAGLU            |                                                                    |
| At3g10080  | 0.61         | 0.0049  | putative germin-like protein, manganese ion binding, nutrient reservoir                                                        |                  |                                                                    |
| At1g63245  | 0.61         | 0.0094  | Clavata 3-/ ESR-related 14                                                                                                     | CLE14            |                                                                    |
| At3g62780  | 0.61         | 0.0051  | C2 domain-containing protein                                                                                                   |                  |                                                                    |
| At1g03660  | 0.61         | 0.0418  | unknown protein, similar to ankyrin repeat family protein                                                                      |                  |                                                                    |
| At1g63450  | 0.61         | 0.0301  | exostosin family protein                                                                                                       |                  |                                                                    |
| At5g06570  | 0.61         | 0.0099  | unknown protein, similar to CXE carboxylesterase                                                                               |                  |                                                                    |
| At1g09350  | 0.61         | 0.0194  | galactinol synthase 3                                                                                                          | GOLS3            |                                                                    |
| At4g17490  | 0.60         | 0.0231  | ethylene-responsive element-binding factor 6                                                                                   | ERF6             | Cold-, drought- and UVB-stress response                            |
| At5g64120  | 0.60         | 0.0067  | peroxidase 71, putative peroxidase, haem peroxidase domain                                                                     | PER71            |                                                                    |
| At5g62860  | 0.60         | 0.0070  | F-box family protein-related                                                                                                   |                  |                                                                    |
| At3g60420  | 0.60         | 0.0186  | <u>unknown protein, PRIB5 domain, phosphoglycerate mutase domain</u>                                                           |                  | OPDA response                                                      |
| At5g01810  | 0.60         | 0.0115  | CBL-interacting protein kinase 15, serine/threonine protein kinase                                                             | CIPK15           | Methyl jasmonate response                                          |
| At5g44130  | 0.60         | 0.0243  | fasciclin-like arabinogalactan-protein                                                                                         | FLA13            | Methyl jasmonate response                                          |
| At2g19990  | 0.60         | 0.0462  | pathogenesis-related protein 1                                                                                                 | PR1              |                                                                    |
| At4g08810  | 0.60         | 0.0028  | short under blue light 1, calcium-binding protein involved in cryptochrome and phytochrome coaction                            | SUB1             |                                                                    |
| At4g10270  | 0.60         | 0.0218  | wound-responsive family protein                                                                                                |                  | NaCl response                                                      |
| At2g15340  | 0.60         | 0.0031  | glycine-rich protein                                                                                                           |                  |                                                                    |
| At1g02930  | 0.59         | 0.0127  | glutathione S-transferase                                                                                                      | GSTF6            | Local herbivory response                                           |
| At3g19030  | 0.59         | 0.0137  | unknown protein                                                                                                                |                  | Cold-, drought- and UVB-stress response/ NaCl response             |
| At3g46190  | 0.59         | 0.0339  | mepirin and TRAF homology domain-containing protein / MATH domain-containing protein                                           |                  |                                                                    |
| At5g63160  | 0.59         | 0.0091  | BTB and TAZ domain protein 1, transcription regulator                                                                          | BT1              |                                                                    |
| At2g22800  | 0.59         | 0.0013  | homeobox-leucine zipper protein 9, transcription factor                                                                        | HAT9             |                                                                    |
| At5g05440  | 0.59         | 0.0066  | unknown protein                                                                                                                |                  | Methyl jasmonate response                                          |
| At1g47480  | 0.58         | 0.0370  | <u>unknown protein, similar to CXE carboxylesterase</u>                                                                        |                  |                                                                    |
| At5g65925  | 0.58         | 0.0035  | unknown protein                                                                                                                |                  |                                                                    |
| At3g49840  | 0.58         | 0.0033  | <u>proline-rich family protein</u>                                                                                             |                  |                                                                    |
| At2g27370  | 0.58         | 0.0107  | <u>integral membrane family protein</u>                                                                                        |                  |                                                                    |
| At1g08420  | 0.58         | 0.0266  | kelch repeat-containing protein/ serine/threonine phosphoesterase family protein                                               |                  |                                                                    |
| At1g19390  | 0.58         | 0.0211  | wall-associated receptor kinase-like 11                                                                                        | WAKL11           | NaCl response                                                      |
| At5g47200  | 0.58         | 0.0039  | <u>Arabidopsis Rab GTPase homolog D2b, GTP-binding protein</u>                                                                 | RABD2b/<br>Rab1A |                                                                    |
| At4g26080  | 0.58         | 0.0017  | ABA insensitive 1, protein phosphatase 2C avirulence-responsive family protein / avirulence induced gene (AIG1) family protein | ABI1             | Local herbivory response/ NaCl response/ Methyl jasmonate response |
| At1g33880  | 0.58         | 0.0468  | class IV chitinase                                                                                                             | EP3              | Local herbivory response                                           |
| At3g54420  | 0.58         | 0.0225  | unknown protein                                                                                                                |                  |                                                                    |
| At5g15120  | 0.58         | 0.0020  | unknown protein                                                                                                                |                  |                                                                    |
| At3g52420  | 0.57         | 0.0270  | putative outer envelope membrane protein                                                                                       |                  |                                                                    |
| At5g45105  | 0.57         | 0.0485  | <u>ZRT-, IRT-related protein 8, ZIP family putative zinc transporter</u>                                                       | ZIP8             | Metal homeostasis                                                  |

Supplementary Table 2

| AGI Number | Signal ratio | P value | Annotation                                                                                                                            | Name             | Class                                                                       |
|------------|--------------|---------|---------------------------------------------------------------------------------------------------------------------------------------|------------------|-----------------------------------------------------------------------------|
| At5g06490  | 0.57         | 0.0111  | zinc finger (C3HC4-type RING finger) family protein                                                                                   | L5D              | Upregulated under iron deficiency                                           |
| At2g27550  | 0.57         | 0.0055  | centroradialis (CEN), phosphatidylethanolamine binding                                                                                | ATC              | NaCl response                                                               |
| At1g03080  | 0.57         | 0.0022  | kinase interacting family protein                                                                                                     |                  | Methyl jasmonate response                                                   |
| At3g19010  | 0.57         | 0.0165  | oxidoreductase, 2OG-Fe(II) oxygenase family protein                                                                                   |                  | Methyl jasmonate response                                                   |
| At4g21680  | 0.56         | 0.0049  | proton-dependent oligopeptide transport (POT) family protein                                                                          |                  | Upregulated under iron deficiency/ NaCl response/ Methyl jasmonate response |
| At5g59680  | 0.56         | 0.0330  | leucine-rich repeat protein kinase, putative                                                                                          |                  |                                                                             |
| At1g78000  | 0.56         | 0.0324  | sulfate transporter 1;2, high-affinity plasma membrane sulfate uptake system                                                          | SULTR1;2         | OPDA response                                                               |
| At2g35850  | 0.56         | 0.0020  | unknown protein                                                                                                                       |                  |                                                                             |
| At1g62510  | 0.56         | 0.0222  | protease inhibitor/seed storage/lipid transfer protein (LTP) family protein                                                           |                  | NaCl response                                                               |
| At3g46900  | 0.56         | 0.0052  | Copper transporter 2, plasma membrane copper uptake system                                                                            | COPT2            | Upregulated under iron deficiency/Metal homeostasis                         |
| At2g35000  | 0.56         | 0.0132  | zinc finger (C3HC4-type RING finger) family protein                                                                                   |                  |                                                                             |
| At5g17820  | 0.55         | 0.0446  | peroxidase 57, putative peroxidase, haem peroxidase domain                                                                            | PER57            |                                                                             |
| At2g20670  | 0.55         | 0.0002  | unknown protein                                                                                                                       |                  | Methyl jasmonate response                                                   |
| At2g15830  | 0.55         | 0.0338  | unknown protein                                                                                                                       |                  |                                                                             |
| At5g02780  | 0.54         | 0.0142  | In2-1-like protein, putative glutathione-S-transferase                                                                                |                  | Upregulated under iron deficiency                                           |
| At1g09090  | 0.54         | 0.0082  | respiratory burst oxidase protein B (RbohB) / NADPH oxidase                                                                           | RBOHB            | Methyl jasmonate response                                                   |
| At2g39520  | 0.54         | 0.0321  | unknown protein                                                                                                                       |                  |                                                                             |
| At4g09100  | 0.54         | 0.0105  | zinc finger (C3HC4-type RING finger) family protein                                                                                   |                  |                                                                             |
| At1g59960  | 0.54         | 0.0050  | putative aldo/keto reductase                                                                                                          |                  |                                                                             |
| At5g60660  | 0.54         | 0.0050  | plasma membrane intrinsic protein 2;4, water channel, major intrinsic protein (MIP) family                                            | PIP2;4/<br>PIP2F |                                                                             |
| At1g67810  | 0.53         | 0.0003  | Fe-S metabolism associated domain-containing protein                                                                                  |                  | OPDA response                                                               |
| At2g41970  | 0.53         | 0.0109  | protein kinase, putative                                                                                                              |                  |                                                                             |
| At2g20960  | 0.53         | 0.0289  | unknown protein, phospholipase-like domain                                                                                            | pEARLI4          |                                                                             |
| At5g38910  | 0.53         | 0.0209  | germin-like protein, putative                                                                                                         |                  |                                                                             |
| At3g21710  | 0.53         | 0.0004  | unknown protein                                                                                                                       |                  |                                                                             |
| At4g34930  | 0.52         | 0.0069  | 1-phosphatidylinositol phosphodiesterase-related                                                                                      |                  |                                                                             |
| At1g10170  | 0.52         | 0.0082  | NF-X1 type zinc finger family protein                                                                                                 |                  |                                                                             |
| At3g18170  | 0.52         | 0.0211  | hypothetical protein                                                                                                                  |                  |                                                                             |
| At2g34180  | 0.52         | 0.0016  | CBL-interacting protein kinase 13                                                                                                     | CIPK13           |                                                                             |
| At4g08620  | 0.51         | 0.0243  | sulfate transporter 1;1, high affinity plasma membrane sulfate uptake system                                                          | SULTR1;1         |                                                                             |
| At3g07720  | 0.51         | 0.0085  | kelch repeat-containing protein                                                                                                       |                  | Upregulated under iron deficiency                                           |
| At1g60750  | 0.51         | 0.0013  | pseudogene, aldo/keto reductase family                                                                                                |                  | OPDA response                                                               |
| At3g13650  | 0.51         | 0.0056  | disease resistance response                                                                                                           |                  | OPDA response                                                               |
| At3g63360  | 0.50         | 0.0329  | defensin-like (DEFL) family protein                                                                                                   |                  |                                                                             |
| At5g57625  | 0.48         | 0.0458  | putative pathogenesis-related protein, allergen                                                                                       |                  |                                                                             |
| At5g65980  | 0.48         | 0.0068  | V5/Tpx-1-related family protein                                                                                                       |                  |                                                                             |
| At5g66985  | 0.47         | 0.0091  | auxin efflux carrier family protein                                                                                                   |                  |                                                                             |
| At5g45380  | 0.47         | 0.0070  | unknown protein                                                                                                                       |                  |                                                                             |
| At1g76800  | 0.44         | 0.0060  | sodium:solute symporter family protein                                                                                                |                  |                                                                             |
|            |              |         | putative nodulin                                                                                                                      | CCCI4            | Metal homeostasis                                                           |
|            |              |         | metal tolerance protein 3, cation diffusion facilitator family of membrane transport proteins, vacuolar                               |                  |                                                                             |
| At3g58810  | 0.43         | 0.0077  | sequestration of Zn/Co                                                                                                                | MTP3             | Upregulated under iron deficiency/ Metal homeostasis/OPDA response          |
| At1g73120  | 0.43         | 0.0068  | unknown protein                                                                                                                       |                  | Upregulated under iron deficiency                                           |
| At4g33070  | 0.42         | 0.0004  | putative pyruvate decarboxylase                                                                                                       |                  | Methyl jasmonate response                                                   |
| At1g01580  | 0.40         | 0.0187  | ferric reduction oxidase 2, ferric-chelate reductase, responsible for the majority of iron(III)-chelate reduction at the root surface | FRO2             | Upregulated under iron deficiency/ Metal homeostasis                        |
