# Supplementary material for: Wounding of Arabidopsis halleri leaves enhances cadmium accumulation that acts as a defense against herbivory
Source: PubMed Central journal article supplement (PMC4427619; doi:10.1007/s10534-015-9829-9), 2015-03-10
Supplement: 10534_2015_9829_MOESM3_ESM.pdf [file 10534_2015_9829_MOESM3_ESM.pdf]

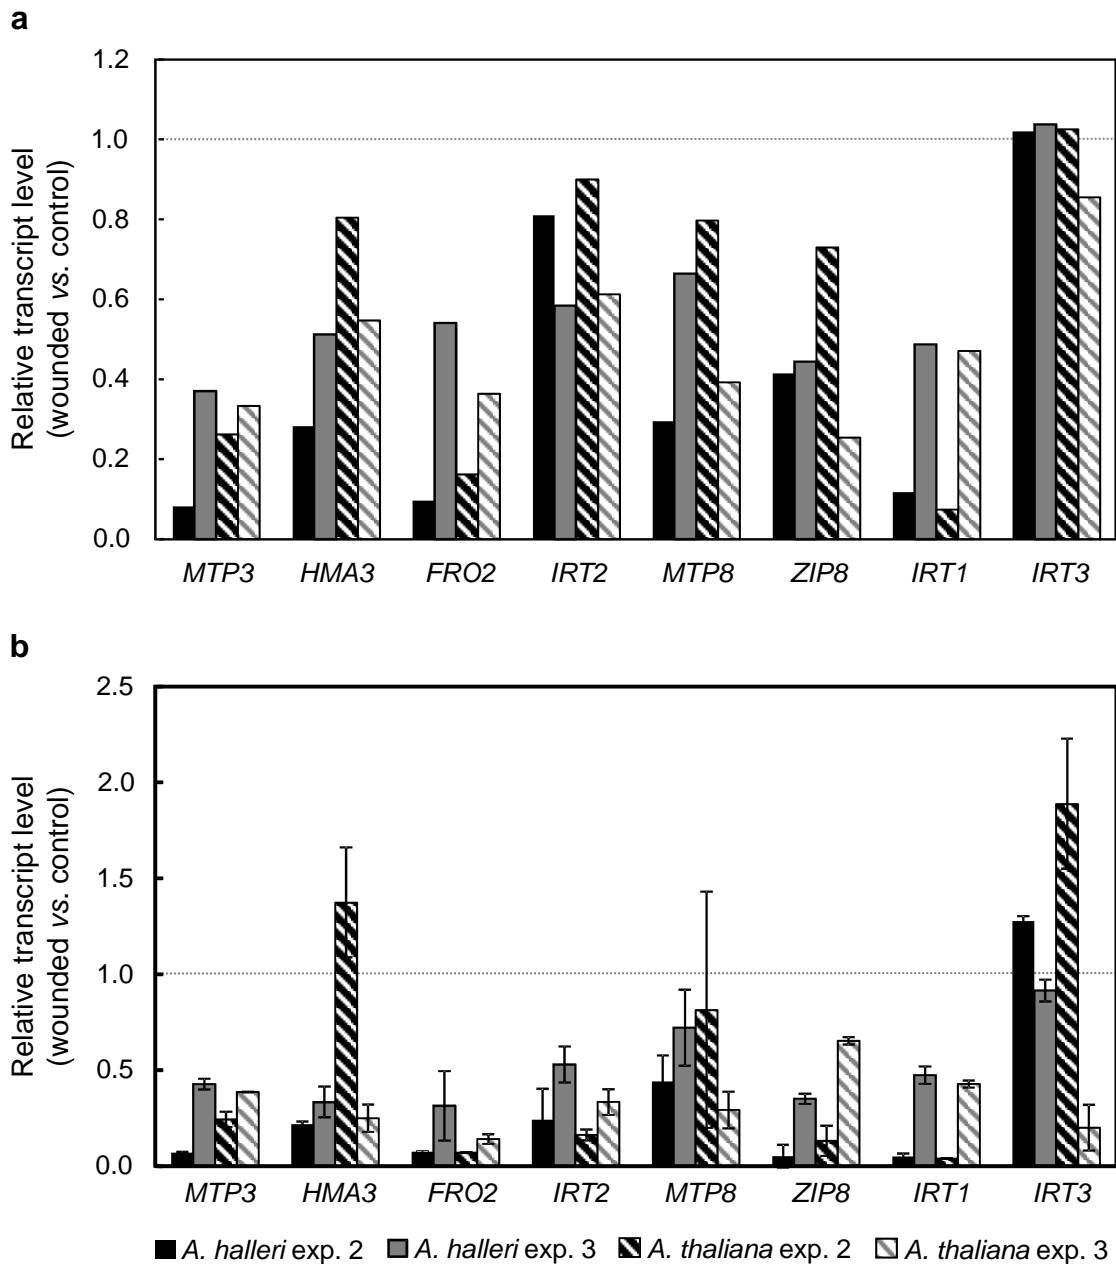

**Supplementary Figure 1: Real-time RT-PCR (qPCR) validation of gene expression determined by microarray hybridization.** For seven selected iron deficiency response metal homeostasis genes (*MTP3*, *HMA3*, *FRO2*, *IRT2*, *MTP8*, *ZIP8*, *IRT1*) and one Zn-deficiency response metal homeostasis gene as a negative control (*IRT3*), bars show transcript levels in leaves of wounded relative to non-wounded *A. halleri* and *A. thaliana* plants based on (a) CATMA microarray hybridization and (b) quantitative real-time RT-PCR, using the same RNA. For qPCR, values represent fold changes in gene expression calculated by dividing relative transcript levels (RTL) of wounding treatments by RTL of controls (see Talke *et al.*, 2006). Across all four replicates, average microarray values for *IRT1* (*A.h.* fold change: 0.44,  $P = 0.073$ , *A.t.* fold change: 0.39,  $P = 0.069$ ) did not pass the stringent cut-off values. According to the microarray data, *IRT3* transcript levels showed no wounding-dependent regulation and served as a negative control (*A.h.* fold change: 1.02,  $P = 0.631$ , *A.t.* fold change: 1.05,  $P = 0.482$ ). *A.h.*, *A. halleri*; *A.t.*, *A. thaliana*.
